# Supplementary material for: Dual detection of nafcillin using a molecularly imprinted polymer-based platform coupled to thermal and fluorescence read-out
Source: Royal Society of Chemistry journal article supplement (doi:10.1039/d1ma00192b), 2021-01-01
Supplement: d1ma00192b1.pdf [file d1ma00192b1.pdf]

# Supporting Information:

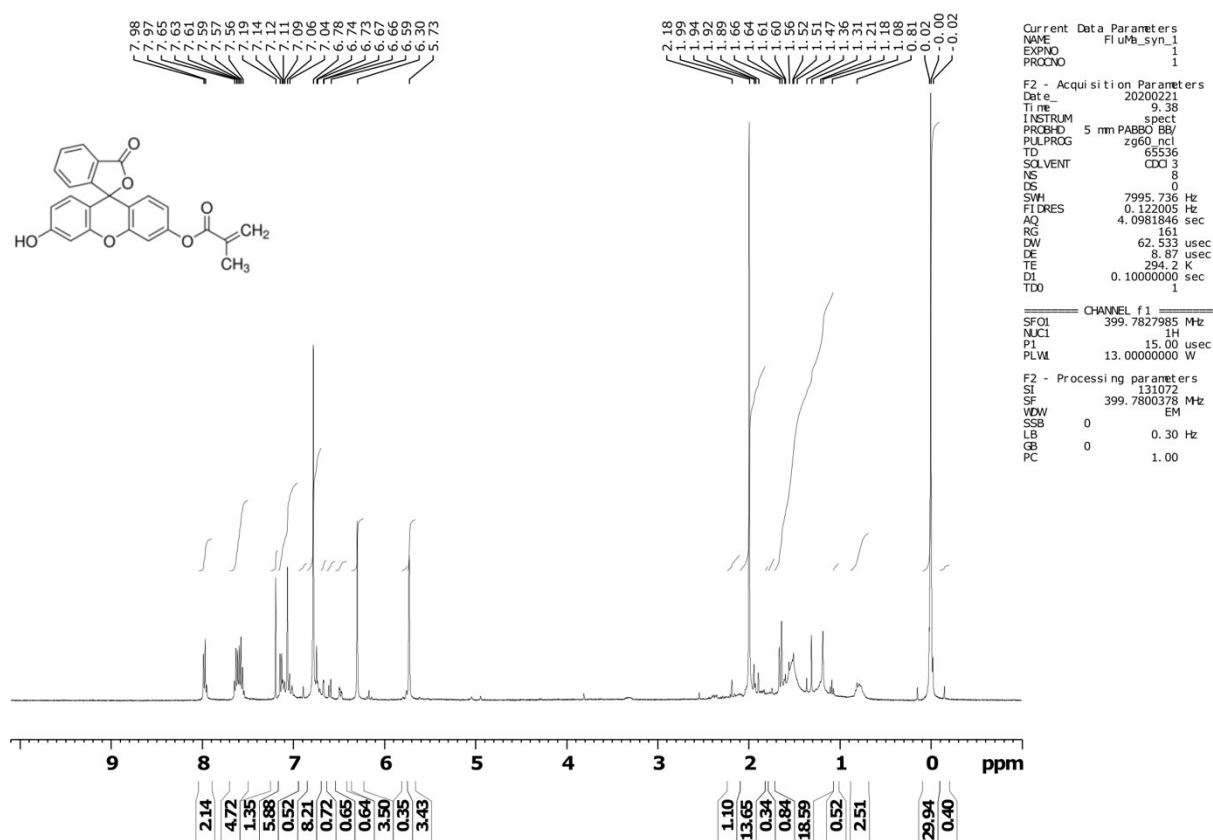

Figure A1 – <sup>1</sup>H NMR spectrum of the synthesised FluMa.

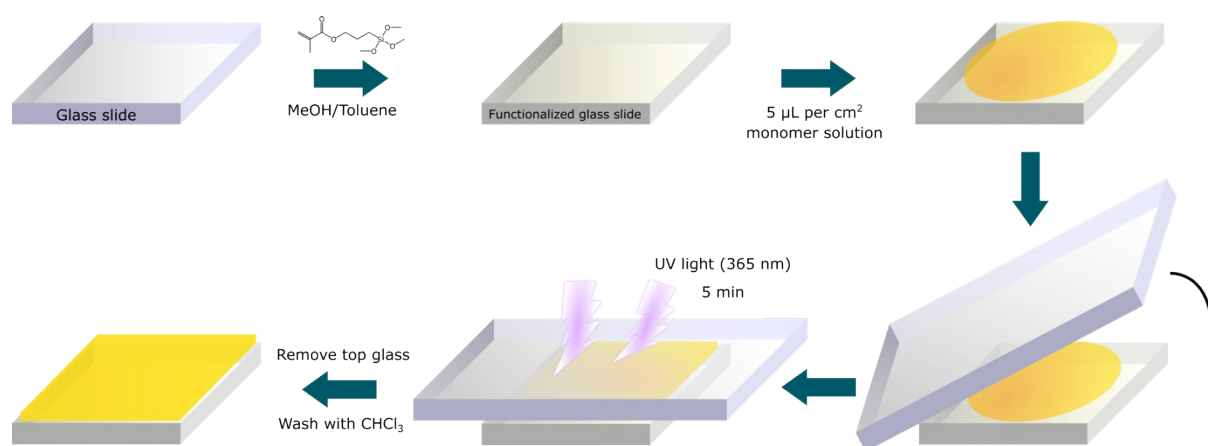

Figure B1 - Schematic of protocol for the formation of imprinted polymer films on glass substrate.

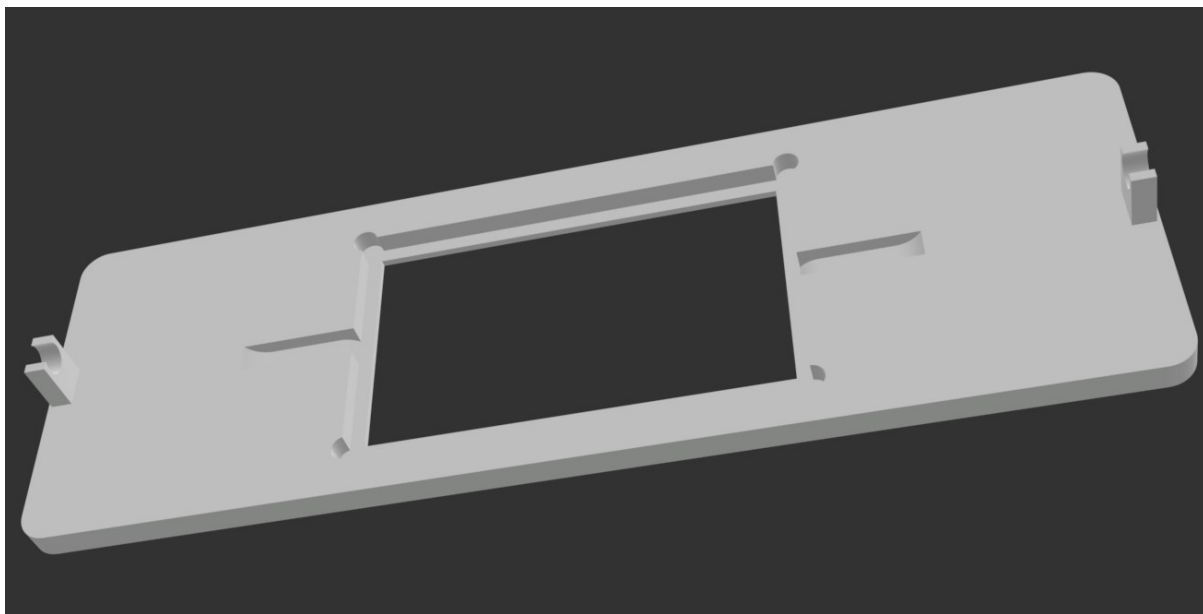

Figure C1 - 3D render of custom designed flow cell holder for microscope analysis.

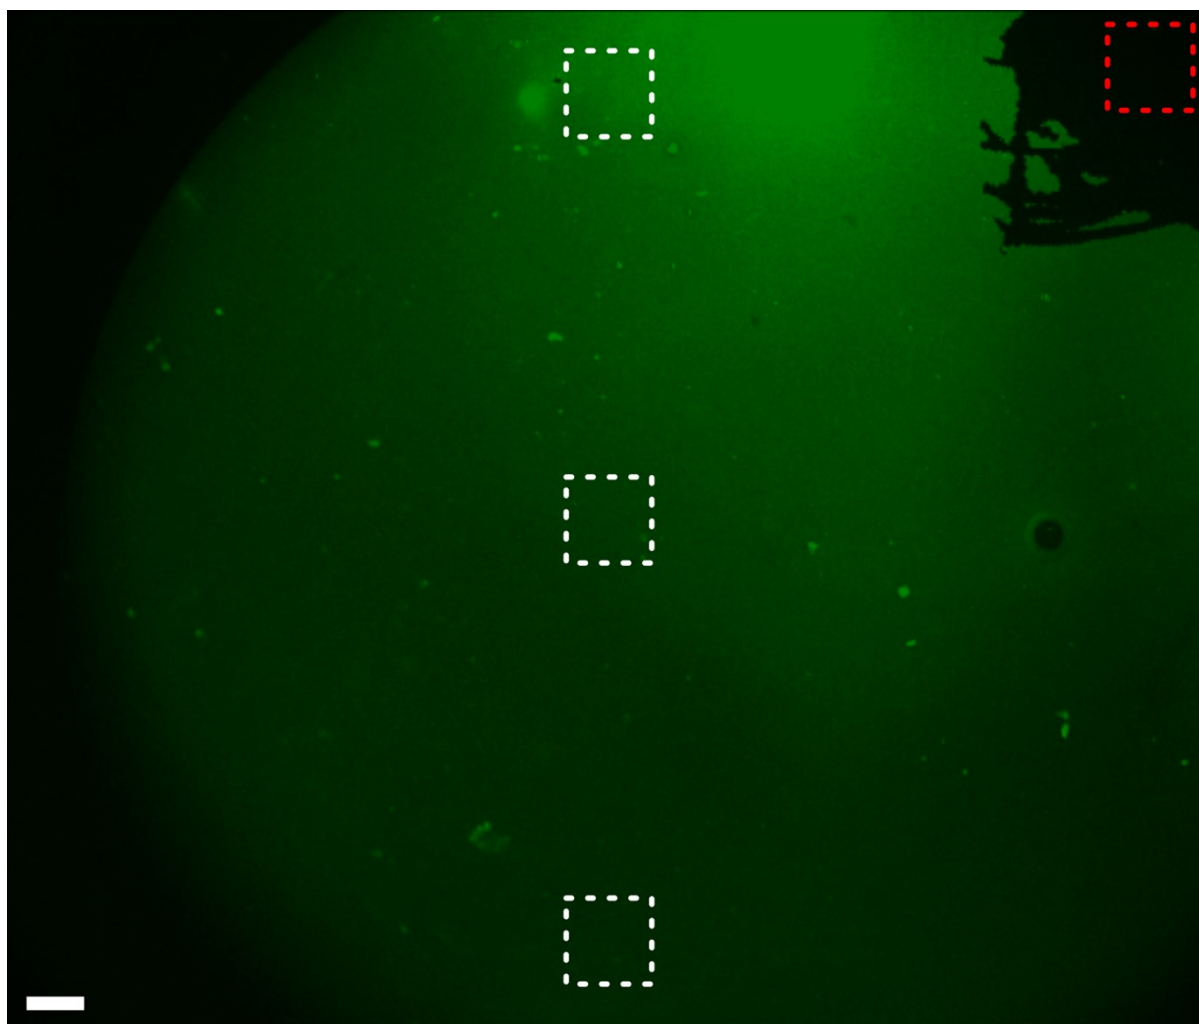

Figure D1 - Fluorescent micrograph of non-imprinted polymer film, showing regions of analysis (white) and background subtraction (red). [scale bar = 200  $\mu\text{m}$ ]

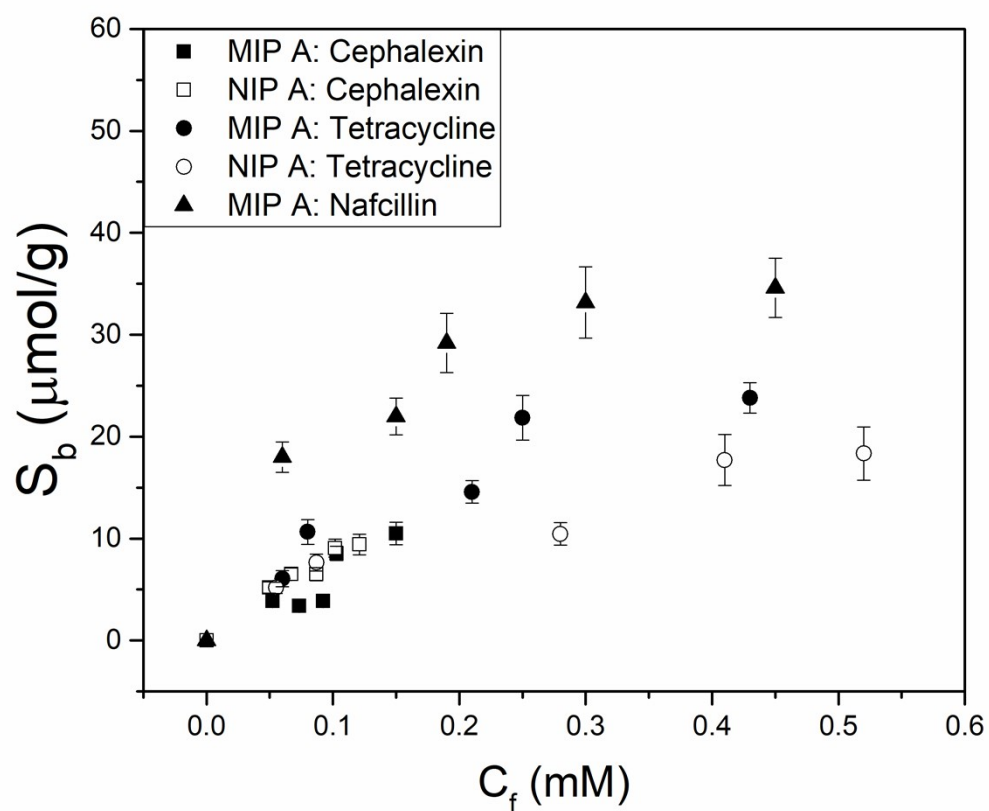

Figure E1 - Batch rebinding measurements using UV-vis spectroscopy for a nafcillin-imprinted polymer (MIP A) using solutions containing nafcillin, cephalexin and tetracycline in PBS.

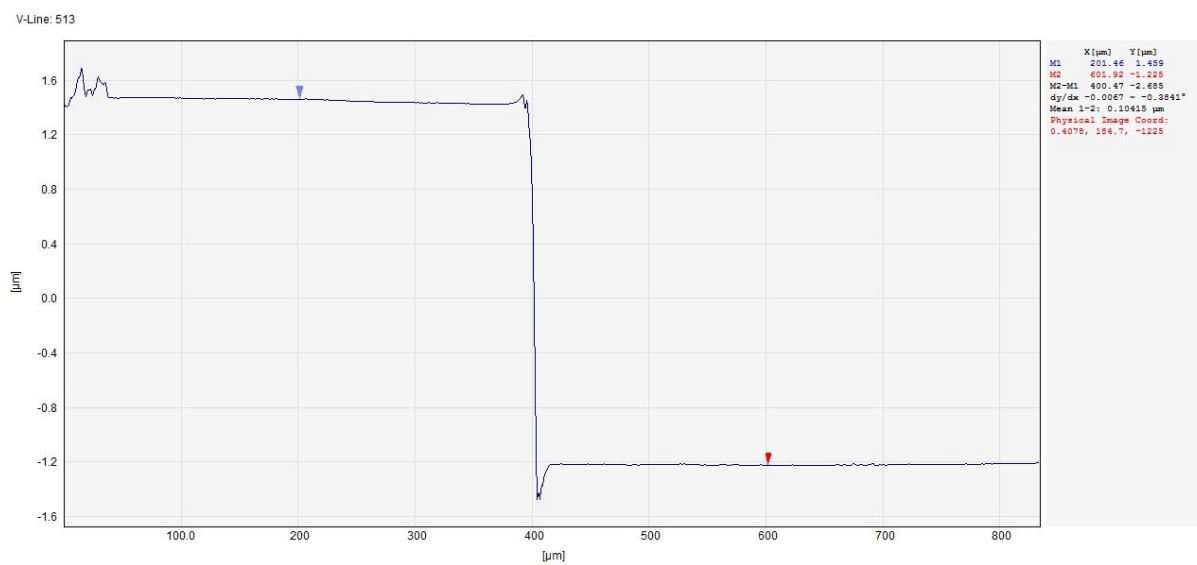

Figure F1 - Profile of the polymer film thickness on glass using white light profilometry.

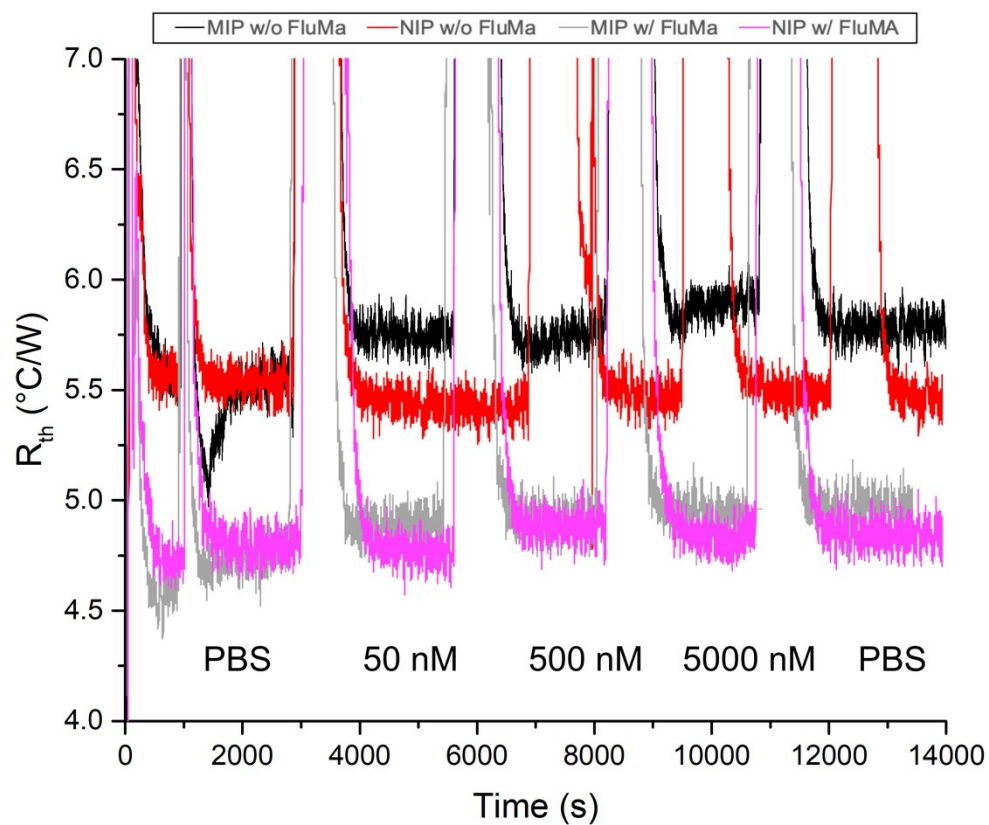

Figure G1 - Thermal resistance measurements for imprinted and non-imprinted polymer films with three layers, with injections of PBS containing increasing concentrations of nafcillin.

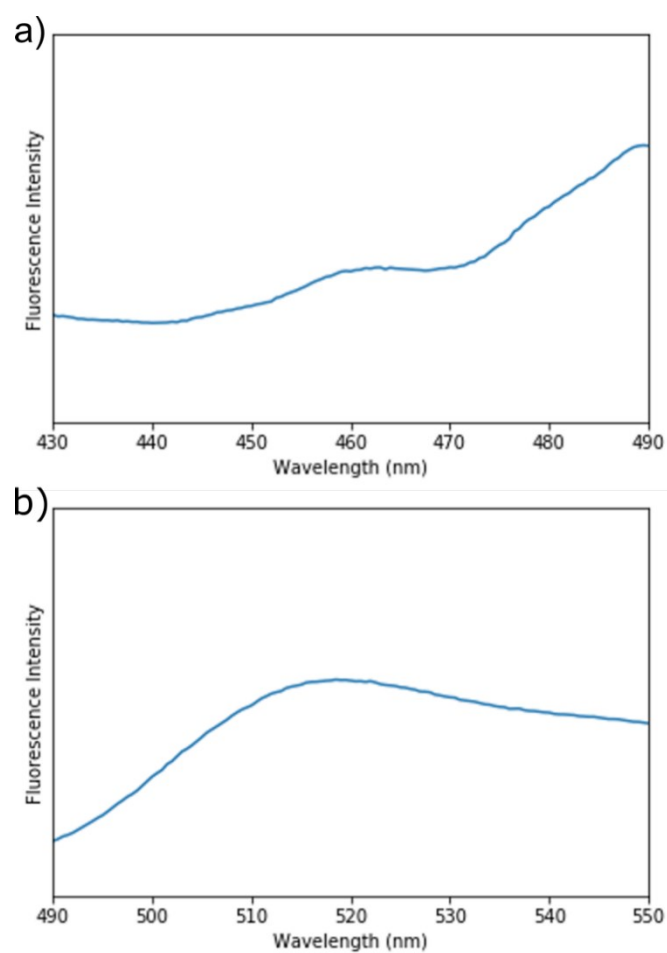

Figure H1 - Fluorescence spectra for FluMa-containing polymer film on glass in PBS, where a) is the excitation spectrum with  $\lambda_{em} = 515$  nm, and b) is the excitation spectrum with  $\lambda_{ex} = 460$  nm.
